# Supplementary material
Source: publisher figshare collection journal article supplement (https://acs.figshare.com/ndownloader/files/5786451)
Supplement: Supplementary file 1 [file 5786451]

data_MOSHE_NACHMANI_23/1/02_50KV_26M
#------------------------------------------------------------------------------
_audit_creation_date                  'Sun Mar 24 13:44:03 2002'
_audit_creation_method                'from TEXRAY.INF file'
#------------------------------------------------------------------------------
_computing_data_collection            'CAD4 Diffractometer Control'
_computing_cell_refinement            'CAD4 Diffractometer Control'
_computing_data_reduction             'teXsan'
_computing_structure_solution          SHELXS86
_computing_structure_refinement       'teXsan'
_computing_publication_material       'teXsan'
#------------------------------------------------------------------------------
_cell_length_a                         10.350(4)
_cell_length_b                         16.650(5)
_cell_length_c                         9.89(1)
_cell_angle_alpha                      93.38(5)
_cell_angle_beta                       112.04(6)
_cell_angle_gamma                      77.05(3)
_cell_volume                           1538(1)
_cell_formula_units_Z                  2
_cell_measurement_temperature          293.2
_cell_measurement_reflns_used          24
_cell_measurement_theta_min            20.0
_cell_measurement_theta_max            29.0
#------------------------------------------------------------------------------
_symmetry_cell_setting                 triclinic
_symmetry_space_group_name_H-M        'P -1       '
_symmetry_Int_Tables_number            2
loop_
_symmetry_equiv_pos_as_xyz
  '   +x,   +y,   +z'
  '   -x,   -y,   -z'
#------------------------------------------------------------------------------
_exptl_crystal_description            'prism'
_exptl_crystal_colour                 'colorless'
_exptl_crystal_size_max                0.490
_exptl_crystal_size_mid                0.250
_exptl_crystal_size_min                0.160
_exptl_crystal_density_diffrn          1.094
_exptl_crystal_density_meas            0.000
_chemical_formula_weight               506.81
_exptl_crystal_F_000                   556.00
_exptl_absorpt_coefficient_mu          0.448
#------------------------------------------------------------------------------
_diffrn_special_details                none
_diffrn_ambient_temperature            293.2
_diffrn_radiation_wavelength           1.5418
_diffrn_radiation_type                 CuKalpha
_diffrn_radiation_source              'X-ray tube'
_diffrn_radiation_monochromator        graphite
_diffrn_radiation_detector             scintillation
_diffrn_measurement_device            'unknown'
_diffrn_measurement_method            'omega/2-theta scans'

_diffrn_standards_number              3
_diffrn_standards_interval_count      100
_diffrn_standards_decay_%             1.61
loop_
_diffrn_standard_refln_index_h
_diffrn_standard_refln_index_k
_diffrn_standard_refln_index_l
   5 5 -1   1 9 1   4 -2 -4

_diffrn_reflns_number                  4564
_reflns_number_total                   4564
_reflns_number_observed                3904
_reflns_observed_criterion             3.00
_diffrn_reflns_av_R_equivalents        0.00
_diffrn_reflns_limit_h_min             -11
_diffrn_reflns_limit_h_max             10
_diffrn_reflns_limit_k_min             -18
_diffrn_reflns_limit_k_max             18
_diffrn_reflns_limit_l_min             0
_diffrn_reflns_limit_l_max             11
_diffrn_reflns_theta_min               2
_diffrn_reflns_theta_max               59.97

_diffrn_orient_matrix_UB_11            0.10139
_diffrn_orient_matrix_UB_12           -0.03160
_diffrn_orient_matrix_UB_13            0.03509
_diffrn_orient_matrix_UB_21            0.03346
_diffrn_orient_matrix_UB_22            0.05263
_diffrn_orient_matrix_UB_23            0.02789
_diffrn_orient_matrix_UB_31           -0.00155
_diffrn_orient_matrix_UB_32           -0.00546
_diffrn_orient_matrix_UB_33            0.09948
#------------------------------------------------------------------------------
loop_
_atom_type_symbol
_atom_type_oxidation_number
_atom_type_number_in_cell
_atom_type_scat_dispersion_real
_atom_type_scat_dispersion_imag
_atom_type_scat_source
  C  0    76 0.018 0.009    'International Tables'
  H  0   100 0.000 0.000    'International Tables'
#------------------------------------------------------------------------------
loop_
_atom_site_label
_atom_site_fract_x
_atom_site_fract_y
_atom_site_fract_z
_atom_site_U_iso_or_equiv
_atom_site_thermal_displace_type
 C(1)   0.5033(2)   0.2908(1)   0.3701(2)   0.032       Uij
 C(2)   0.5783(2)   0.2620(1)   0.6425(2)   0.035       Uij
 C(3)   0.5940(2)   0.2037(1)   0.4172(2)   0.034       Uij
 C(4)   0.6332(2)   0.1877(1)   0.5663(2)   0.035       Uij
 C(5)   0.7101(2)   0.1105(1)   0.6286(2)   0.043       Uij
 C(6)   0.7502(2)   0.0490(1)   0.5393(2)   0.051       Uij
 C(7)   0.7155(2)   0.0661(1)   0.3900(2)   0.050       Uij
 C(8)   0.6360(2)   0.1446(1)   0.3288(2)   0.041       Uij
 C(9)   0.3748(2)   0.2996(1)   0.4147(2)   0.032       Uij
 C(10)  0.4159(2)   0.2838(1)   0.5642(2)   0.033       Uij
 C(11)  0.3147(2)   0.2887(1)   0.6266(2)   0.035       Uij
 C(12)  0.1686(2)   0.3135(1)   0.5375(2)   0.037       Uij
 C(13)  0.1277(2)   0.3298(1)   0.3872(2)   0.038       Uij
 C(14)  0.2317(2)   0.3222(1)   0.3246(2)   0.034       Uij
 C(15)  0.5887(2)   0.3512(1)   0.4625(2)   0.033       Uij
 C(16)  0.6319(2)   0.3347(1)   0.6123(2)   0.035       Uij
 C(17)  0.7096(2)   0.3841(1)   0.7141(2)   0.042       Uij
 C(18)  0.7382(2)   0.4512(1)   0.6603(2)   0.047       Uij
 C(19)  0.6911(2)   0.4689(1)   0.5139(2)   0.046       Uij
 C(20)  0.6152(2)   0.4190(1)   0.4100(2)   0.039       Uij
 C(21)  0.7551(3)   0.0949(1)   0.7913(2)   0.055       Uij
 C(22)  0.8991(3)   0.1145(2)   0.8790(3)   0.079       Uij
 C(23)  0.8237(4)   -0.0376(1)  0.6033(3)   0.079       Uij
 C(24)  0.7216(6)   -0.0893(2)  0.6016(4)   0.127       Uij
 C(25)  0.7597(4)   0.0013(2)   0.2927(3)   0.079       Uij
 C(26)  0.6458(6)   -0.0451(2)  0.2106(4)   0.123       Uij
 C(27)  0.6049(2)   0.1661(1)   0.1711(2)   0.049       Uij
 C(28)  0.7179(3)   0.2061(2)   0.1589(3)   0.065       Uij
 C(29)  0.3612(2)   0.2700(1)   0.7887(2)   0.040       Uij
 C(30)  0.3835(3)   0.3454(1)   0.8803(2)   0.054       Uij
 C(31)  0.0562(2)   0.3197(1)   0.6027(2)   0.046       Uij
 C(32)  0.0040(3)   0.2408(2)   0.5956(3)   0.063       Uij
 C(33)  -0.0285(2)  0.3585(1)   0.2919(2)   0.045       Uij
 C(34)  -0.0758(2)  0.4519(1)   0.2764(3)   0.060       Uij
 C(35)  0.1896(2)   0.3351(1)   0.1620(2)   0.045       Uij
 C(36)  0.1751(3)   0.2556(2)   0.0797(2)   0.063       Uij
 C(37)  0.7627(2)   0.3684(2)   0.8770(2)   0.058       Uij
 C(38)  0.5607(2)   0.4403(1)   0.2501(2)   0.049       Uij
 H(1)   0.476       0.301       0.269       0.038       Uij
 H(2)   0.606       0.251       0.744       0.042       Uij
 H(18)  0.792       0.486       0.727       0.057       Uij
 H(19)  0.711       0.516       0.482       0.056       Uij
 H(211) 0.685       0.128       0.823       0.066       Uij
 H(212) 0.760       0.039       0.808       0.066       Uij
 H(221) 0.922       0.104       0.980       0.095       Uij
 H(222) 0.970       0.081       0.849       0.095       Uij
 H(223) 0.895       0.171       0.863       0.095       Uij
 H(231) 0.878       -0.064      0.548       0.095       Uij
 H(232) 0.885       -0.033      0.702       0.095       Uij
 H(241) 0.665       -0.063      0.654       0.153       Uij
 H(242) 0.662       -0.096      0.504       0.153       Uij
 H(243) 0.774       -0.142      0.646       0.153       Uij
 H(251) 0.782       0.028       0.224       0.094       Uij
 H(252) 0.842       -0.037      0.352       0.094       Uij
 H(261) 0.562       -0.008      0.152       0.148       Uij
 H(262) 0.679       -0.084      0.150       0.148       Uij
 H(263) 0.624       -0.073      0.278       0.148       Uij
 H(271) 0.603       0.117       0.117       0.058       Uij
 H(272) 0.515       0.203       0.132       0.058       Uij
 H(281) 0.809       0.169       0.197       0.078       Uij
 H(282) 0.696       0.219       0.059       0.078       Uij
 H(283) 0.720       0.255       0.213       0.078       Uij
 H(291) 0.290       0.249       0.804       0.048       Uij
 H(292) 0.448       0.230       0.819       0.048       Uij
 H(301) 0.410       0.331       0.980       0.065       Uij
 H(302) 0.457       0.366       0.868       0.065       Uij
 H(303) 0.297       0.386       0.850       0.065       Uij
 H(311) 0.095       0.334       0.702       0.056       Uij
 H(312) -0.023      0.362       0.551       0.056       Uij
 H(321) -0.067      0.249       0.638       0.076       Uij
 H(322) -0.036      0.226       0.497       0.076       Uij
 H(323) 0.082       0.198       0.648       0.076       Uij
 H(331) -0.044      0.336       0.198       0.054       Uij
 H(332) -0.084      0.338       0.334       0.054       Uij
 H(341) -0.062      0.475       0.370       0.072       Uij
 H(342) -0.021      0.473       0.233       0.072       Uij
 H(343) -0.174      0.467       0.216       0.072       Uij
 H(351) 0.101       0.374       0.126       0.054       Uij
 H(352) 0.261       0.357       0.146       0.054       Uij
 H(361) 0.103       0.234       0.093       0.076       Uij
 H(362) 0.150       0.266       -0.021      0.076       Uij
 H(363) 0.263       0.216       0.116       0.076       Uij
 H(371) 0.738       0.320       0.896       0.070       Uij
 H(372) 0.864       0.362       0.918       0.070       Uij
 H(373) 0.720       0.414       0.920       0.070       Uij
 H(381) 0.498       0.493       0.231       0.059       Uij
 H(382) 0.639       0.441       0.222       0.059       Uij
 H(383) 0.511       0.400       0.196       0.059       Uij

loop_
_atom_site_aniso_label
_atom_site_aniso_U_11
_atom_site_aniso_U_22
_atom_site_aniso_U_33
_atom_site_aniso_U_12
_atom_site_aniso_U_13
_atom_site_aniso_U_23
 C(1)   0.0339(9)   0.0334(9)   0.0277(9)   -0.0075(7)  0.0102(7)   0.0012(7)
 C(2)   0.0360(10)  0.0380(10)  0.0272(9)   -0.0071(7)  0.0079(7)   0.0010(7)
 C(3)   0.0335(10)  0.0333(10)  0.0345(9)   -0.0091(7)  0.0104(8)   -0.0014(7)
 C(4)   0.0341(10)  0.0358(10)  0.0344(9)   -0.0082(8)  0.0111(8)   -0.0003(7)
 C(5)   0.048(1)    0.037(1)    0.041(1)    -0.0070(8)  0.0135(9)   0.0032(8)
 C(6)   0.059(1)    0.036(1)    0.052(1)    -0.0036(9)  0.019(1)    0.0015(9)
 C(7)   0.061(1)    0.039(1)    0.049(1)    -0.0052(9)  0.020(1)    -0.0037(9)
 C(8)   0.046(1)    0.038(1)    0.040(1)    -0.0113(8)  0.0165(9)   -0.0064(8)
 C(9)   0.0350(10)  0.0312(9)   0.0306(9)   -0.0092(7)  0.0111(7)   -0.0013(7)
 C(10)  0.036(1)    0.0317(9)   0.0297(9)   -0.0080(7)  0.0094(8)   -0.0003(7)
 C(11)  0.040(1)    0.0332(9)   0.0320(9)   -0.0086(8)  0.0141(8)   -0.0020(7)
 C(12)  0.039(1)    0.0346(10)  0.0386(10)  -0.0074(8)  0.0165(8)   -0.0027(7)
 C(13)  0.0344(10)  0.039(1)    0.039(1)    -0.0100(8)  0.0100(8)   -0.0015(8)
 C(14)  0.0349(10)  0.0357(9)   0.0320(9)   -0.0106(7)  0.0093(8)   0.0000(7)
 C(15)  0.0278(9)   0.0339(9)   0.0375(9)   -0.0046(7)  0.0127(7)   -0.0034(7)
 C(16)  0.0310(9)   0.0344(10)  0.0380(10)  -0.0040(7)  0.0111(7)   -0.0035(7)
 C(17)  0.0314(10)  0.045(1)    0.046(1)    -0.0071(8)  0.0122(8)   -0.0123(8)
 C(18)  0.040(1)    0.047(1)    0.059(1)    -0.0171(9)  0.0197(9)   -0.0170(9)
 C(19)  0.045(1)    0.038(1)    0.067(1)    -0.0151(9)  0.029(1)    -0.0076(9)
 C(20)  0.0355(10)  0.0355(10)  0.050(1)    -0.0048(8)  0.0210(8)   -0.0005(8)
 C(21)  0.068(1)    0.045(1)    0.046(1)    0.004(1)    0.020(1)    0.0098(9)
 C(22)  0.076(2)    0.088(2)    0.050(1)    -0.004(1)   0.004(1)    0.006(1)
 C(23)  0.116(2)    0.042(1)    0.068(2)    0.015(1)    0.037(2)    0.009(1)
 C(24)  0.225(5)    0.050(2)    0.114(3)    -0.043(2)   0.059(3)    0.011(2)
 C(25)  0.115(2)    0.047(1)    0.060(1)    0.008(1)    0.031(2)    -0.006(1)
 C(26)  0.211(5)    0.064(2)    0.085(2)    -0.045(2)   0.038(3)    -0.029(2)
 C(27)  0.065(1)    0.044(1)    0.038(1)    -0.0094(10) 0.0211(10)  -0.0085(8)
 C(28)  0.075(2)    0.075(2)    0.058(1)    -0.017(1)   0.035(1)    0.002(1)
 C(29)  0.044(1)    0.042(1)    0.0348(10)  -0.0060(8)  0.0162(8)   0.0048(8)
 C(30)  0.068(1)    0.053(1)    0.038(1)    -0.010(1)   0.018(1)    -0.0017(9)
 C(31)  0.040(1)    0.054(1)    0.045(1)    -0.0051(9)  0.0169(9)   0.0021(9)
 C(32)  0.051(1)    0.070(2)    0.080(2)    -0.015(1)   0.033(1)    0.009(1)
 C(33)  0.036(1)    0.055(1)    0.044(1)    -0.0111(9)  0.0115(9)   0.0009(9)
 C(34)  0.045(1)    0.059(1)    0.069(1)    -0.001(1)   0.014(1)    0.011(1)
 C(35)  0.037(1)    0.062(1)    0.0328(10)  -0.0128(9)  0.0063(8)   0.0043(9)
 C(36)  0.064(1)    0.086(2)    0.041(1)    -0.026(1)   0.016(1)    -0.016(1)
 C(37)  0.054(1)    0.065(1)    0.042(1)    -0.015(1)   0.0023(10)  -0.0112(10)
 C(38)  0.055(1)    0.044(1)    0.056(1)    -0.0112(9)  0.026(1)    0.0062(9)
#------------------------------------------------------------------------------
_refine_ls_structure_factor_coef       F
_refine_ls_matrix_type                 full
_refine_ls_weighting_scheme            sigma
_refine_ls_hydrogen_treatment          noref
_refine_ls_extinction_method           Zachariasen_type_2_Gaussian_isotropic
_refine_ls_extinction_coef             44.01753
_refine_ls_number_reflns               3904
_refine_ls_number_parameters           344
_refine_ls_number_restraints           0
_refine_ls_R_factor_obs                0.0530
_refine_ls_wR_factor_obs               0.0990
_refine_ls_goodness_of_fit_obs         2.440
_refine_ls_shift/esd_max               0.0000
_refine_diff_density_min               0.41
_refine_diff_density_max               -0.39
#------------------------------------------------------------------------------
loop_
_geom_bond_atom_site_label_1
_geom_bond_atom_site_label_2
_geom_bond_distance
_geom_bond_publ_flag
    C(1)      C(3)      1.531(3)   yes
    C(1)      C(9)      1.527(3)   yes
    C(1)      C(15)     1.520(3)   yes
    C(2)      C(4)      1.522(3)   yes
    C(2)      C(10)     1.530(3)   yes
    C(2)      C(16)     1.527(3)   yes
    C(3)      C(4)      1.399(3)   yes
    C(3)      C(8)      1.383(3)   yes
    C(4)      C(5)      1.391(3)   yes
    C(5)      C(6)      1.407(3)   yes
    C(5)      C(21)     1.518(3)   yes
    C(6)      C(7)      1.413(3)   yes
    C(6)      C(23)     1.520(3)   yes
    C(7)      C(8)      1.410(3)   yes
    C(7)      C(25)     1.512(3)   yes
    C(8)      C(27)     1.517(3)   yes
    C(9)      C(10)     1.400(3)   yes
    C(9)      C(14)     1.388(3)   yes
    C(10)     C(11)     1.387(3)   yes
    C(11)     C(12)     1.414(3)   yes
    C(11)     C(29)     1.520(3)   yes
    C(12)     C(13)     1.409(3)   yes
    C(12)     C(31)     1.510(3)   yes
    C(13)     C(14)     1.410(3)   yes
    C(13)     C(33)     1.514(3)   yes
    C(14)     C(35)     1.516(3)   yes
    C(15)     C(16)     1.402(3)   yes
    C(15)     C(20)     1.390(3)   yes
    C(16)     C(17)     1.388(3)   yes
    C(17)     C(18)     1.399(3)   yes
    C(17)     C(37)     1.512(3)   yes
    C(18)     C(19)     1.370(3)   yes
    C(19)     C(20)     1.396(3)   yes
    C(20)     C(38)     1.500(3)   yes
    C(21)     C(22)     1.515(4)   yes
    C(23)     C(24)     1.500(5)   yes
    C(25)     C(26)     1.505(5)   yes
    C(27)     C(28)     1.514(3)   yes
    C(29)     C(30)     1.514(3)   yes
    C(31)     C(32)     1.517(3)   yes
    C(33)     C(34)     1.521(3)   yes
    C(35)     C(36)     1.519(3)   yes
#------------------------------------------------------------------------------
loop_
_geom_angle_atom_site_label_1
_geom_angle_atom_site_label_2
_geom_angle_atom_site_label_3
_geom_angle
_geom_angle_publ_flag
   C(3)      C(1)      C(9)      106.9(1)   yes
   C(3)      C(1)      C(15)     107.6(1)   yes
   C(9)      C(1)      C(15)     105.5(1)   yes
   C(4)      C(2)      C(10)     106.4(1)   yes
   C(4)      C(2)      C(16)     107.7(1)   yes
   C(10)     C(2)      C(16)     105.9(1)   yes
   C(1)      C(3)      C(4)      112.1(2)   yes
   C(1)      C(3)      C(8)      126.6(2)   yes
   C(4)      C(3)      C(8)      121.2(2)   yes
   C(2)      C(4)      C(3)      112.1(2)   yes
   C(2)      C(4)      C(5)      127.1(2)   yes
   C(3)      C(4)      C(5)      120.8(2)   yes
   C(4)      C(5)      C(6)      118.7(2)   yes
   C(4)      C(5)      C(21)     120.1(2)   yes
   C(6)      C(5)      C(21)     121.2(2)   yes
   C(5)      C(6)      C(7)      120.5(2)   yes
   C(5)      C(6)      C(23)     119.1(2)   yes
   C(7)      C(6)      C(23)     120.3(2)   yes
   C(6)      C(7)      C(8)      119.8(2)   yes
   C(6)      C(7)      C(25)     121.3(2)   yes
   C(8)      C(7)      C(25)     118.8(2)   yes
   C(3)      C(8)      C(7)      119.0(2)   yes
   C(3)      C(8)      C(27)     120.2(2)   yes
   C(7)      C(8)      C(27)     120.8(2)   yes
   C(1)      C(9)      C(10)     112.0(2)   yes
   C(1)      C(9)      C(14)     126.8(2)   yes
   C(10)     C(9)      C(14)     121.2(2)   yes
   C(2)      C(10)     C(9)      112.2(2)   yes
   C(2)      C(10)     C(11)     126.8(2)   yes
   C(9)      C(10)     C(11)     121.0(2)   yes
   C(10)     C(11)     C(12)     118.7(2)   yes
   C(10)     C(11)     C(29)     120.3(2)   yes
   C(12)     C(11)     C(29)     121.0(2)   yes
   C(11)     C(12)     C(13)     120.1(2)   yes
   C(11)     C(12)     C(31)     119.8(2)   yes
   C(13)     C(12)     C(31)     120.1(2)   yes
   C(12)     C(13)     C(14)     120.5(2)   yes
   C(12)     C(13)     C(33)     120.3(2)   yes
   C(14)     C(13)     C(33)     119.2(2)   yes
   C(9)      C(14)     C(13)     118.5(2)   yes
   C(9)      C(14)     C(35)     120.2(2)   yes
   C(13)     C(14)     C(35)     121.2(2)   yes
   C(1)      C(15)     C(16)     112.1(2)   yes
   C(1)      C(15)     C(20)     125.8(2)   yes
   C(16)     C(15)     C(20)     122.0(2)   yes
   C(2)      C(16)     C(15)     112.2(1)   yes
   C(2)      C(16)     C(17)     127.3(2)   yes
   C(15)     C(16)     C(17)     120.5(2)   yes
   C(16)     C(17)     C(18)     117.1(2)   yes
   C(16)     C(17)     C(37)     123.2(2)   yes
   C(18)     C(17)     C(37)     119.7(2)   yes
   C(17)     C(18)     C(19)     122.2(2)   yes
   C(18)     C(19)     C(20)     121.4(2)   yes
   C(15)     C(20)     C(19)     116.8(2)   yes
   C(15)     C(20)     C(38)     122.3(2)   yes
   C(19)     C(20)     C(38)     120.8(2)   yes
   C(5)      C(21)     C(22)     112.6(2)   yes
   C(6)      C(23)     C(24)     113.4(3)   yes
   C(7)      C(25)     C(26)     113.3(3)   yes
   C(8)      C(27)     C(28)     111.2(2)   yes
   C(11)     C(29)     C(30)     112.7(2)   yes
   C(12)     C(31)     C(32)     113.9(2)   yes
   C(13)     C(33)     C(34)     112.7(2)   yes
   C(14)     C(35)     C(36)     112.3(2)   yes
#------------------------------------------------------------------------------
